# Supplementary material for: Star shaped ferrocenyl truxenes: synthesis, structure and properties
Source: Royal Society of Chemistry journal article supplement (doi:10.1039/c4dt00210e), 2014-01-01
Supplement: c4dt00210e1.pdf [file c4dt00210e1.pdf]

## Star shaped ferrocenyl truxenes: synthesis, structure and properties

Rajneesh Misra,\* Rekha Sharma and Shaikh M. Mobin

### Supporting Information

Department of Chemistry,  
Indian Institute of Technology Indore,  
Indore- 452017, India.

[rajneeshmisra@iiti.ac.in](mailto:rajneeshmisra@iiti.ac.in)

#### Table of Contents

|      |                                                                                              |    |
|------|----------------------------------------------------------------------------------------------|----|
| I    | Crystal data.....                                                                            | S2 |
| II.  | Electrochemical Data for 4b-4c and 5a.....                                                   | S3 |
| III. | Copies of <sup>1</sup> H NMR, <sup>13</sup> C NMR and HRMS Spectra of the New Compounds..... | S5 |

**Table 1.** Crystal data and structure refinement parameter for truxene **4a**.

| <b>Compound</b>                   | <b>4a</b>                                        |
|-----------------------------------|--------------------------------------------------|
| Empirical formula                 | C <sub>99</sub> H <sub>114</sub> Fe <sub>3</sub> |
| Formula weight                    | 1471.45                                          |
| Temperature                       | 150(2) K                                         |
| Wavelength                        | 0.71073 Å                                        |
| Crystal system, space group       | Monoclinic, P 21/n                               |
| Unit cell dimensions              |                                                  |
| a (Å)                             | 16.3107(3)                                       |
| b (Å)                             | b = 18.4332(3)                                   |
| β (°)                             | 90.4590(10)                                      |
| c (Å)                             | 27.2131(4)                                       |
| Volume                            | 8181.6(2) Å <sup>3</sup>                         |
| Z, Calculated density             | 4, 1.195 Mg/m <sup>3</sup>                       |
| Absorption coefficient            | 0.571 mm <sup>-1</sup>                           |
| F(000)                            | 3144                                             |
| Crystal size                      | 0.23 x 0.16 x 0.13 mm                            |
| Theta range for data collection   | 3.11 to 25.00 deg.                               |
| Limiting indices                  | -19 ≤ h ≤ 13, -21 ≤ k ≤ 21, -32 ≤ l ≤ 32         |
| Reflections collected / unique    | 59275 / 14385 [R(int) = 0.0570]                  |
| Completeness to theta = 25.00     | 99.8 %                                           |
| Absorption correction             | Semi-empirical from equivalents                  |
| Max. and min. transmission        | 0.9295 and 0.8799                                |
| Refinement method                 | Full-matrix least-squares on F <sup>2</sup>      |
| Data / restraints / parameters    | 14385 / 0 / 925                                  |
| Goodness-of-fit on F <sup>2</sup> | 1.025                                            |
| Final R indices [I > 2σ(I)]       | R1 = 0.0553, wR2 = 0.1455                        |
| R indices (all data)              | R1 = 0.0721, wR2 = 0.1614                        |
| Largest diff. peak and hole       | 0.940 and -0.511 e.Å <sup>-3</sup>               |

Electrochemical Data for 4b, 4c and 5a.

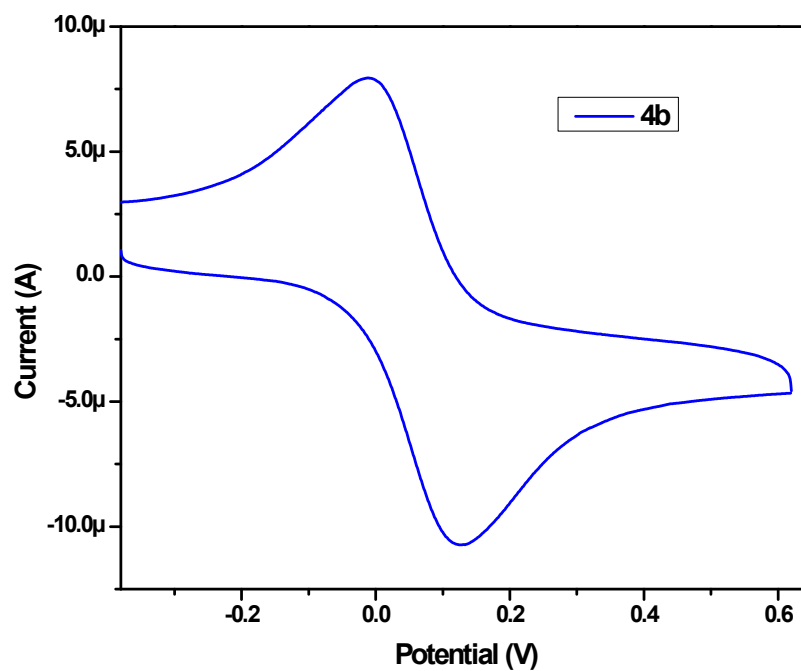

Figure S1. Cyclic voltammogram of truxene 4b.

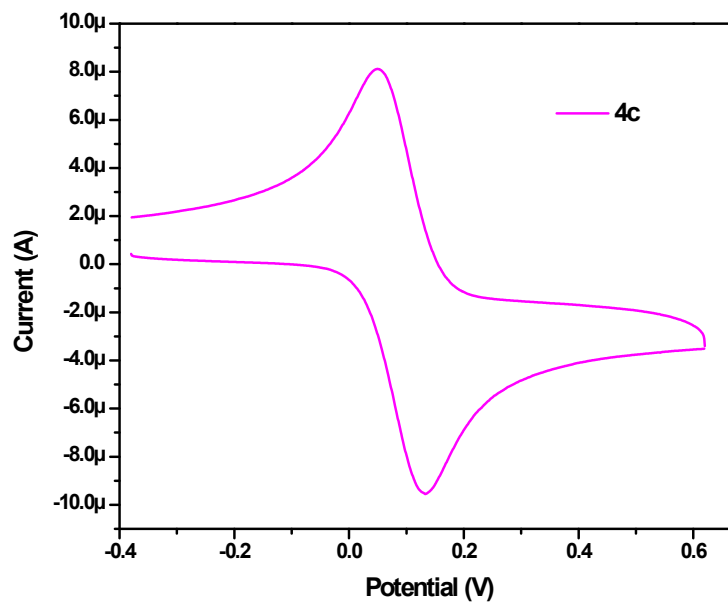

Figure S2. Cyclic voltammogram of truxene 4c.

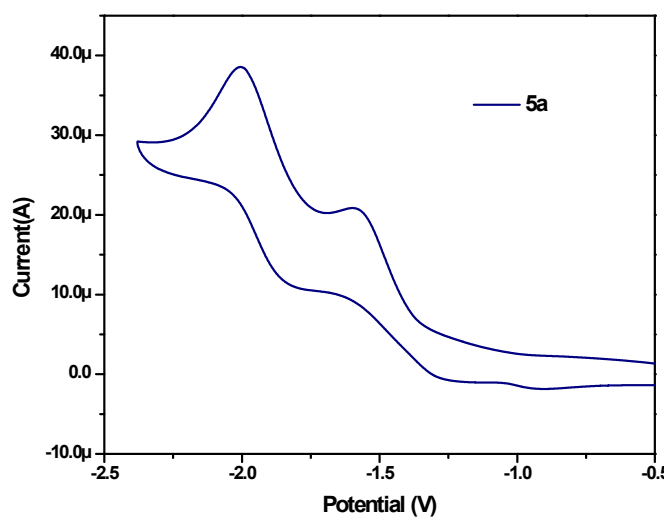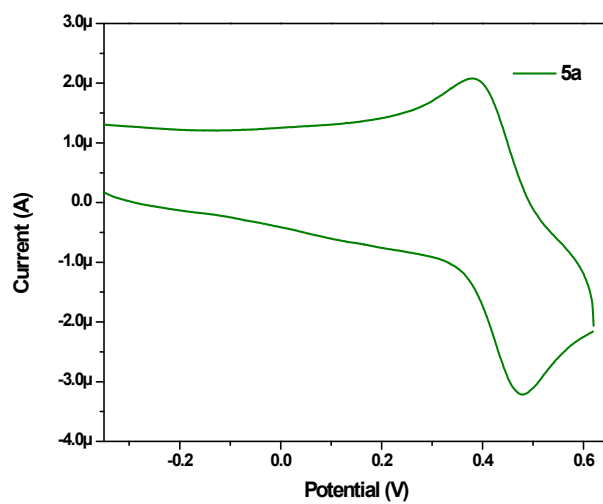

**Figure S3.** Cyclic voltammograms of truxene **5a**.

Copies of  $^1\text{H}$  NMR,  $^{13}\text{C}$  NMR and HRMS Spectra of the Compounds 4a-4c and 5a.

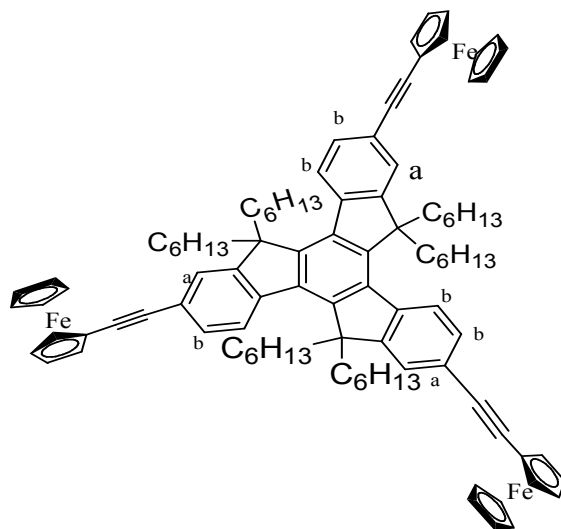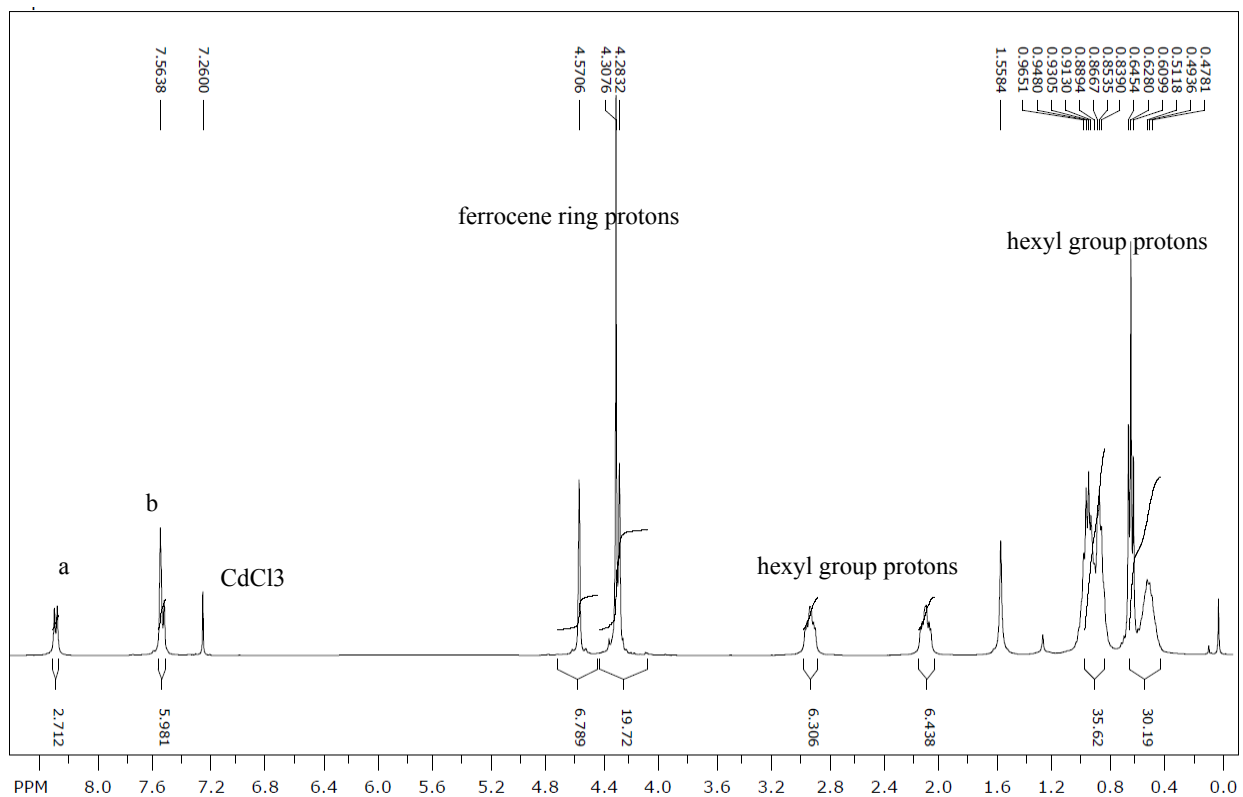

**Figure S4.**  $^1\text{H}$  NMR Spectra of **4a**.

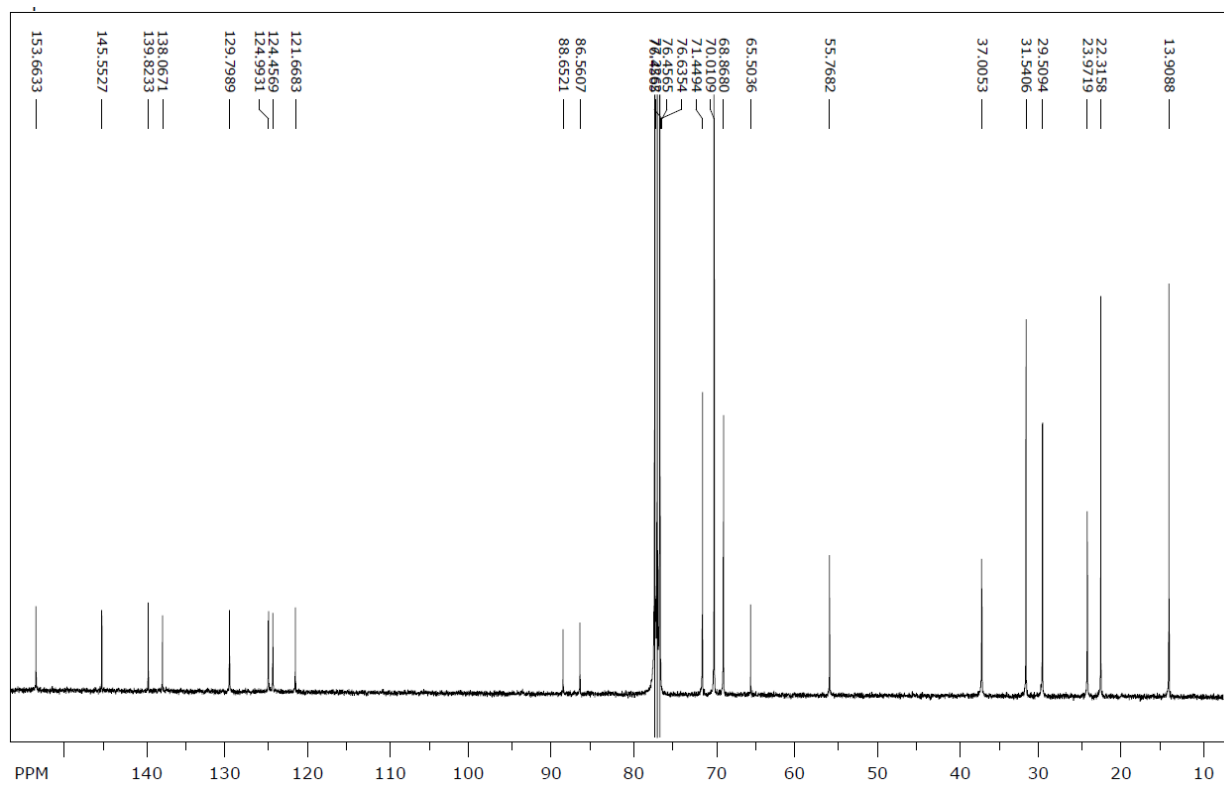

**Figure S5.**  $^{13}\text{C}$  NMR Spectra of **4a**.

# Display Report

## Analysis Info

Analysis Name D:\Data\May 2013\RM-RS-1-53 10-05-2013\_d  
Method tune\_high.m  
Sample Name O  
Comment

Acquisition Date 5/10/2013 12:33:10 PM

Operator Ghanashyam Bhavsar  
Instrument microTOF-Q II 10348

## Acquisition Parameter

|             |            |                       |            |                  |           |
|-------------|------------|-----------------------|------------|------------------|-----------|
| Source Type | ESI        | Ion Polarity          | Positive   | Set Nebulizer    | 0.4 Bar   |
| Focus       | Not active | Set Capillary         | 4500 V     | Set Dry Heater   | 180 °C    |
| Scan Begin  | 50 m/z     | Set End Plate Offset  | -500 V     | Set Dry Gas      | 4.0 l/min |
| Scan End    | 3000 m/z   | Set Collision Cell RF | 1600.0 Vpp | Set Divert Valve | Waste     |

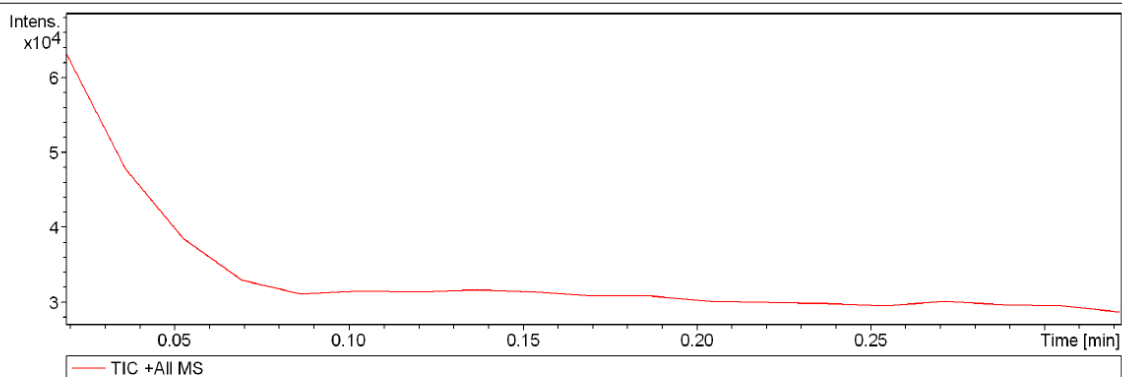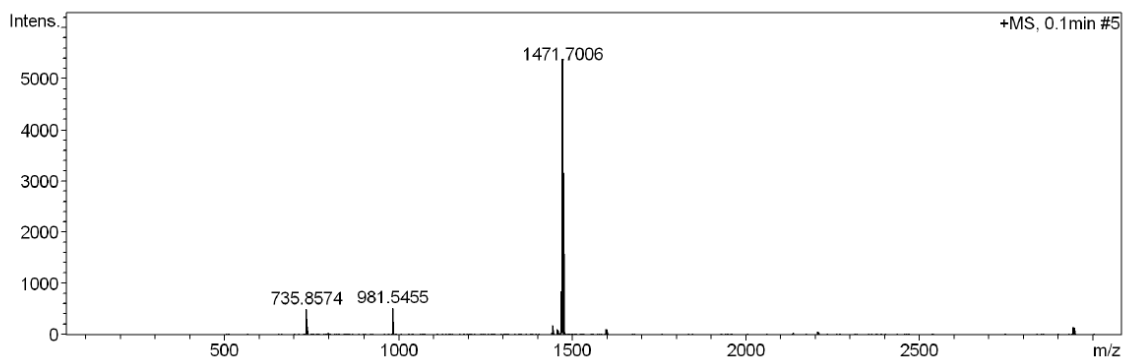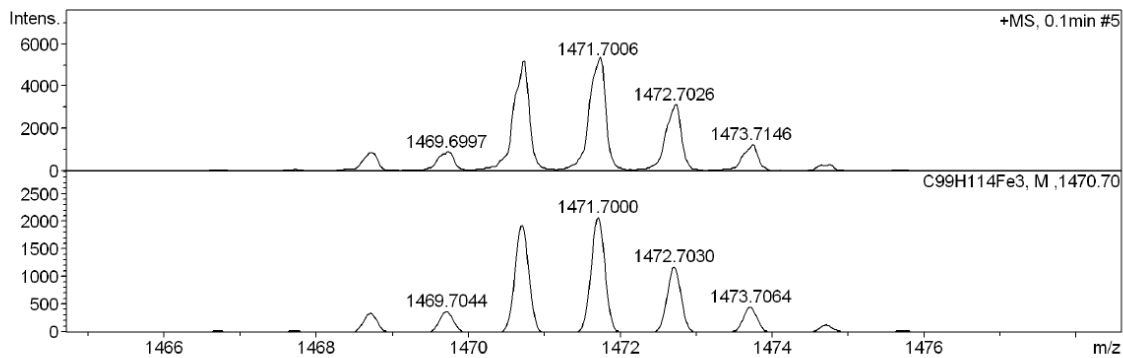

Figure S6. HRMS Spectra of 4a.

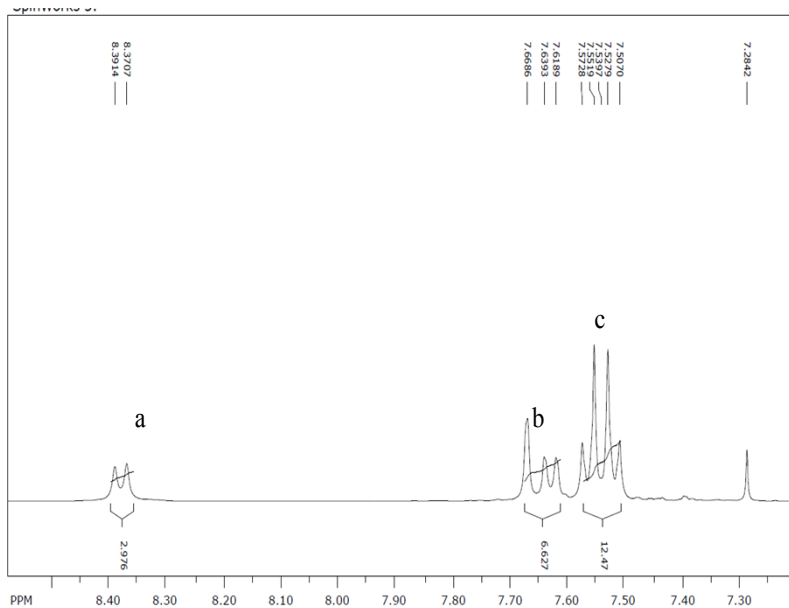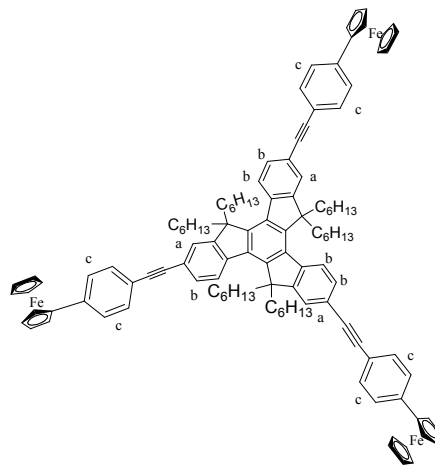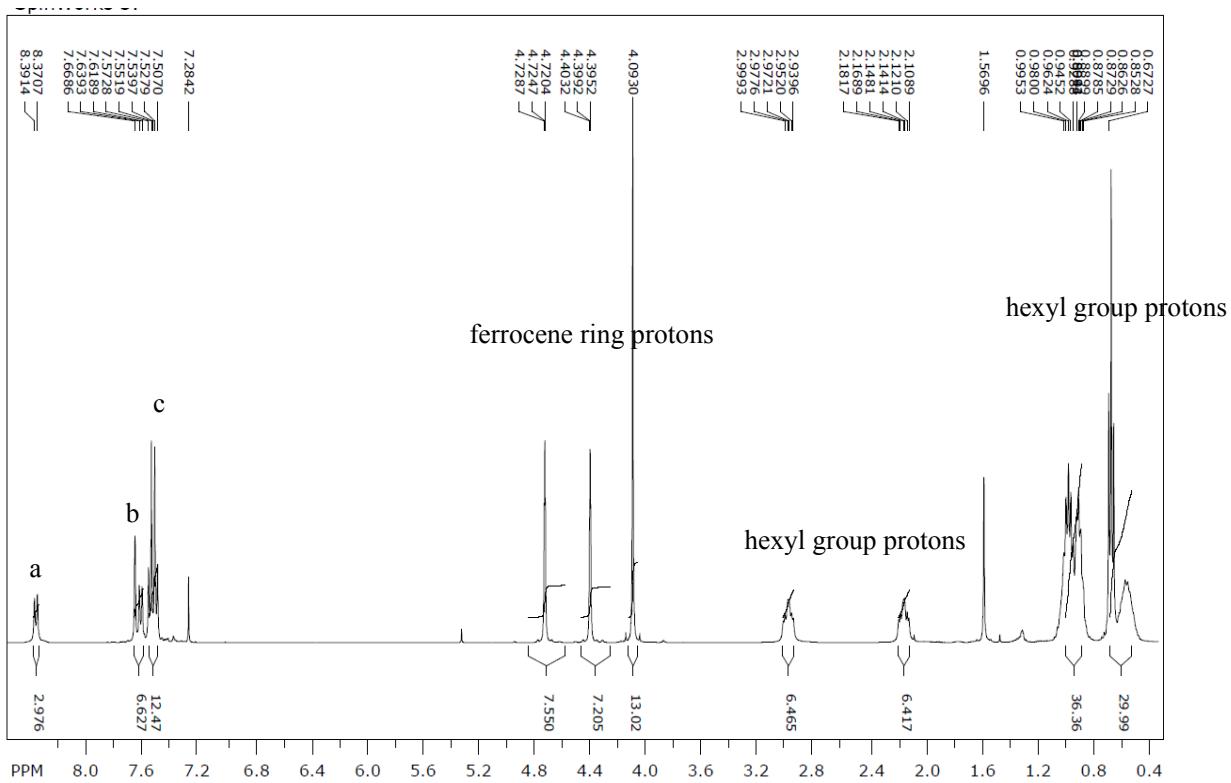

Figure S7. <sup>1</sup>H NMR Spectra of 4b.



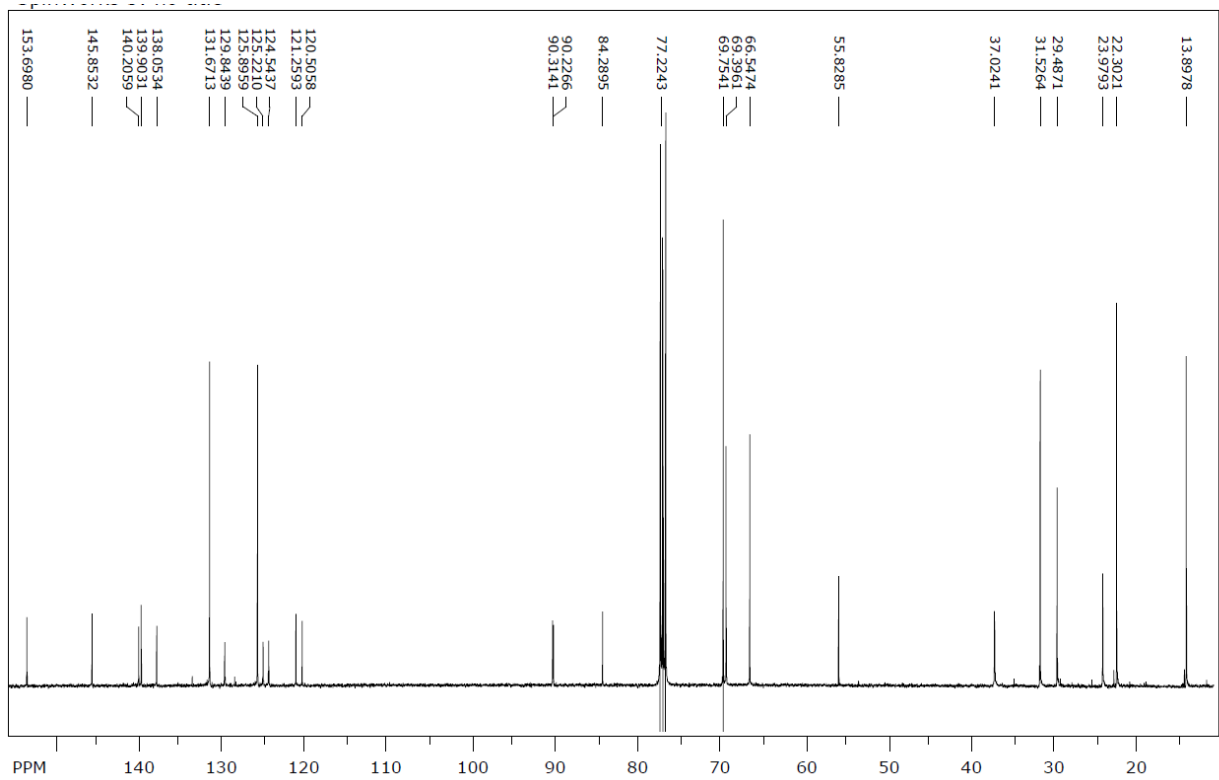

**Figure S8.**  $^{13}\text{C}$  NMR Spectra of **4b**.

# Display Report

## Analysis Info

Analysis Name D:\Data\November 2013\RM-RS-1-95-F2 26-11-2013.d  
Method tune\_wide.m  
Sample Name 0  
Comment

Acquisition Date 11/26/2013 2:55:08 PM

Operator Ghanashyam Bhavsar  
Instrument micrOTOF-Q II 10348

## Acquisition Parameter

|             |            |                       |           |                  |           |
|-------------|------------|-----------------------|-----------|------------------|-----------|
| Source Type | ESI        | Ion Polarity          | Positive  | Set Nebulizer    | 0.4 Bar   |
| Focus       | Not active | Set Capillary         | 4500 V    | Set Dry Heater   | 180 °C    |
| Scan Begin  | 50 m/z     | Set End Plate Offset  | -500 V    | Set Dry Gas      | 4.0 l/min |
| Scan End    | 3000 m/z   | Set Collision Cell RF | 650.0 Vpp | Set Divert Valve | Waste     |

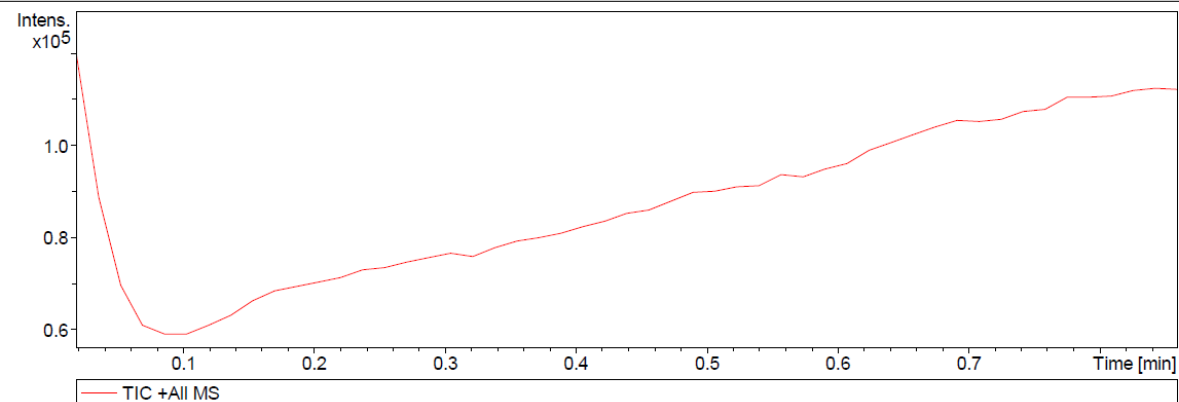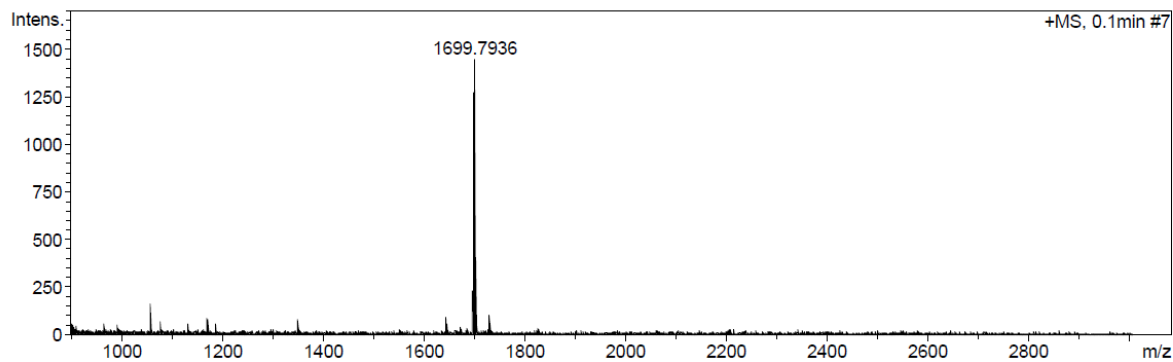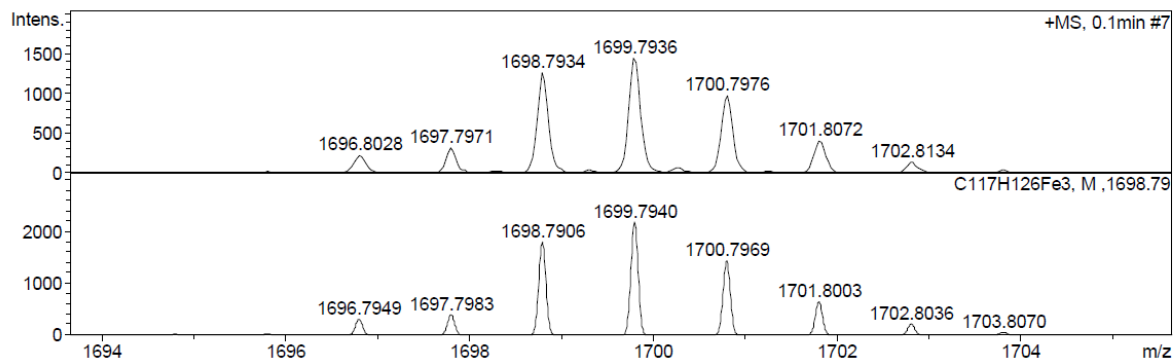

Figure S9. HRMS Spectra of **4b**.

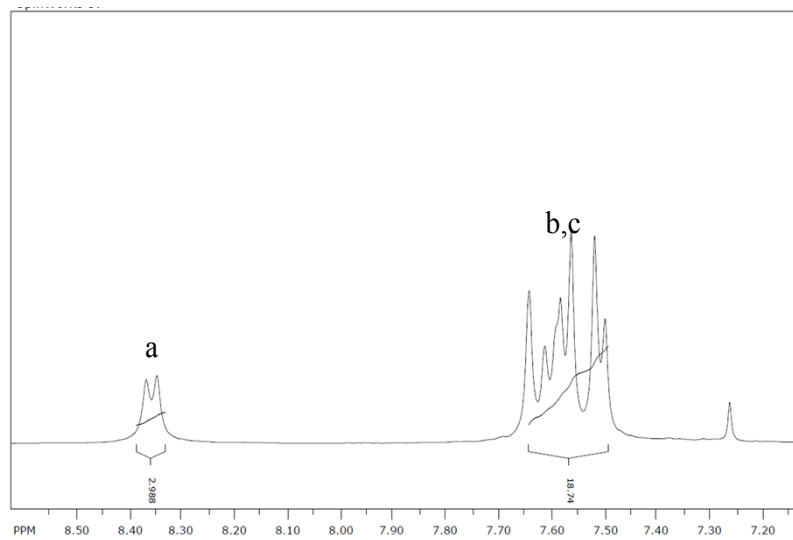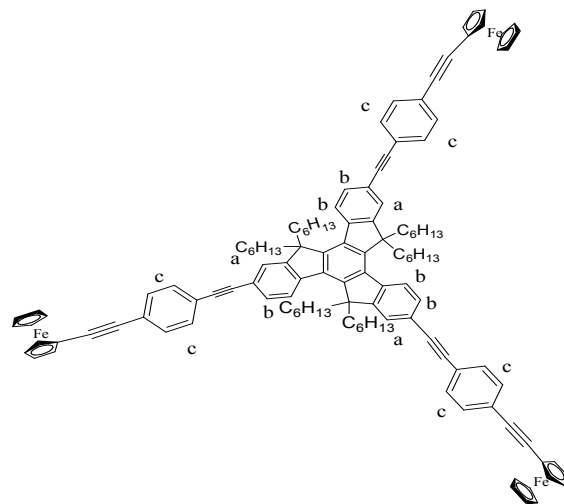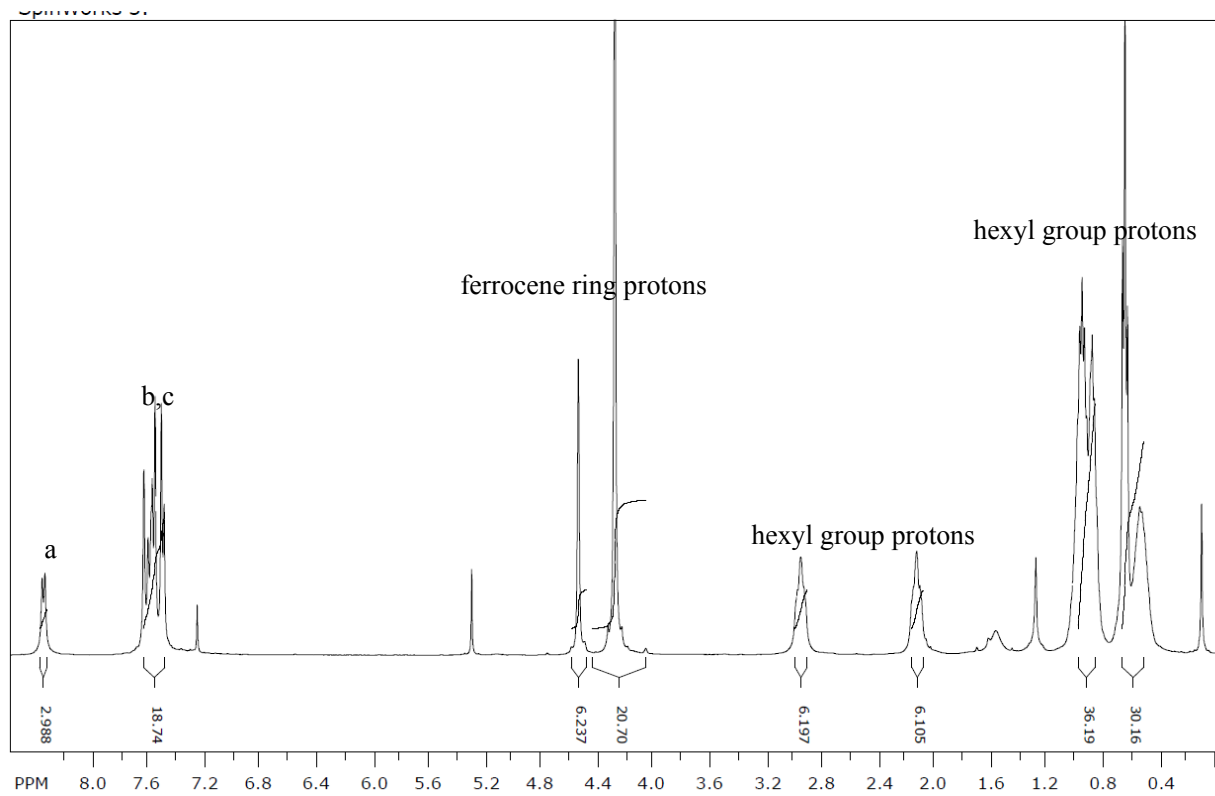

**Figure S10.**  
 $^1\text{H}$  NMR  
 Spectra of **4c**.

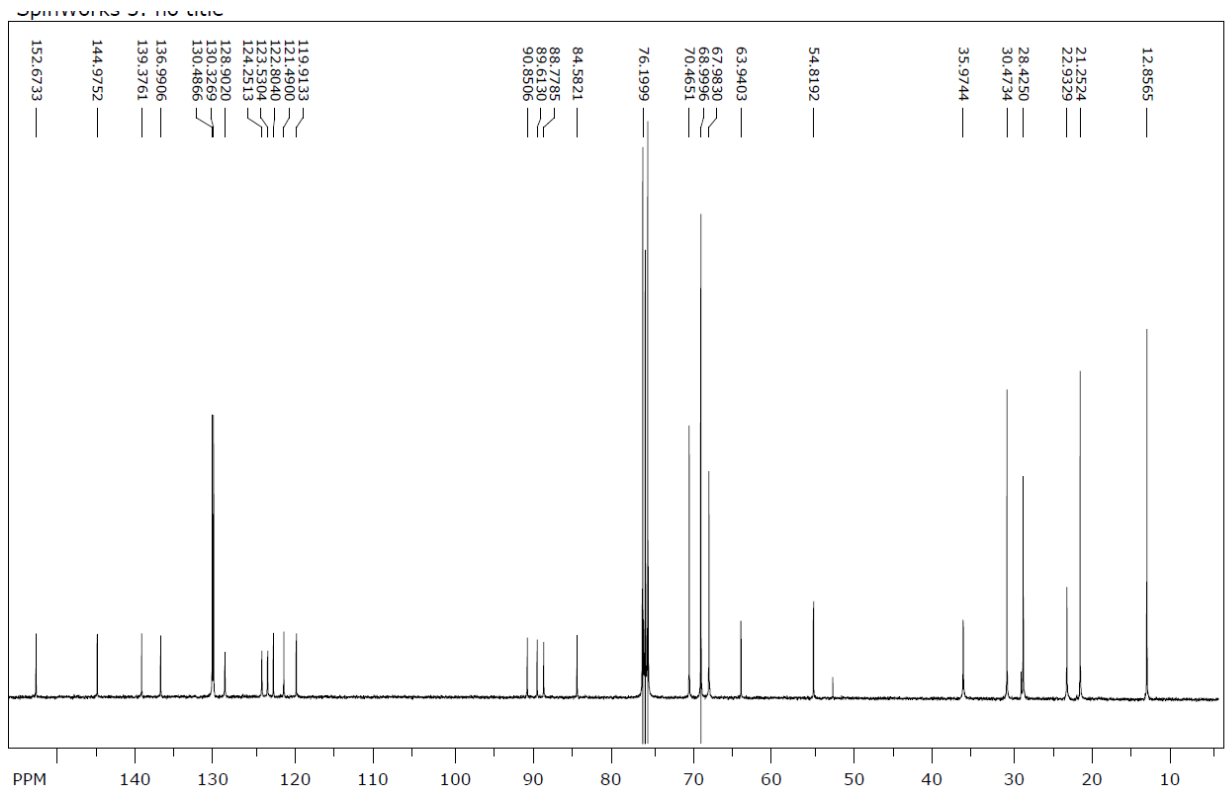

Figure S11. <sup>13</sup>C NMR Spectra of 4c.

# Display Report

## Analysis Info

Analysis Name D:\Data\December 2013\RM-RS-1-98 12-12-2013.d  
Method tune\_high.m  
Sample Name 0  
Comment

Acquisition Date 12/12/2013 12:07:36 PM

Operator Ghanashyam Bhavsar  
Instrument micrOTOF-Q II 10348

## Acquisition Parameter

|             |            |                       |            |                  |           |
|-------------|------------|-----------------------|------------|------------------|-----------|
| Source Type | ESI        | Ion Polarity          | Positive   | Set Nebulizer    | 0.4 Bar   |
| Focus       | Not active | Set Capillary         | 4500 V     | Set Dry Heater   | 180 °C    |
| Scan Begin  | 50 m/z     | Set End Plate Offset  | -500 V     | Set Dry Gas      | 4.0 l/min |
| Scan End    | 3000 m/z   | Set Collision Cell RF | 1600.0 Vpp | Set Divert Valve | Waste     |

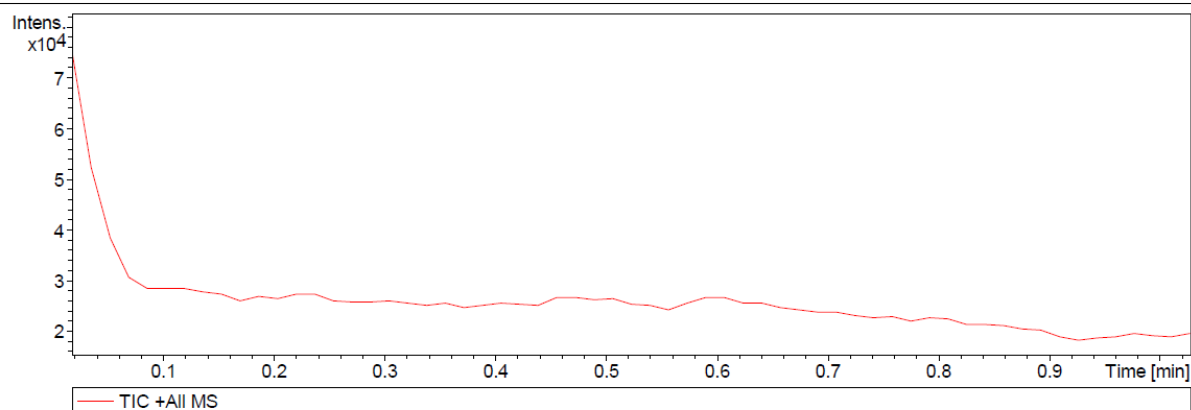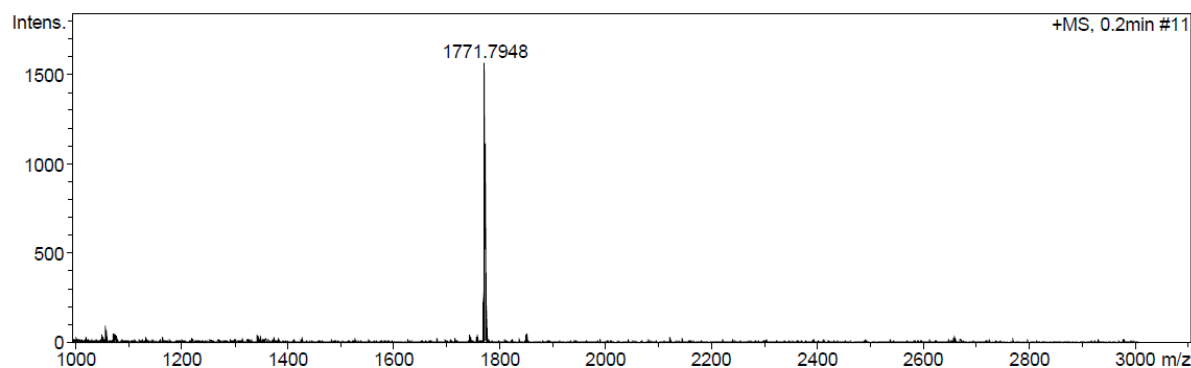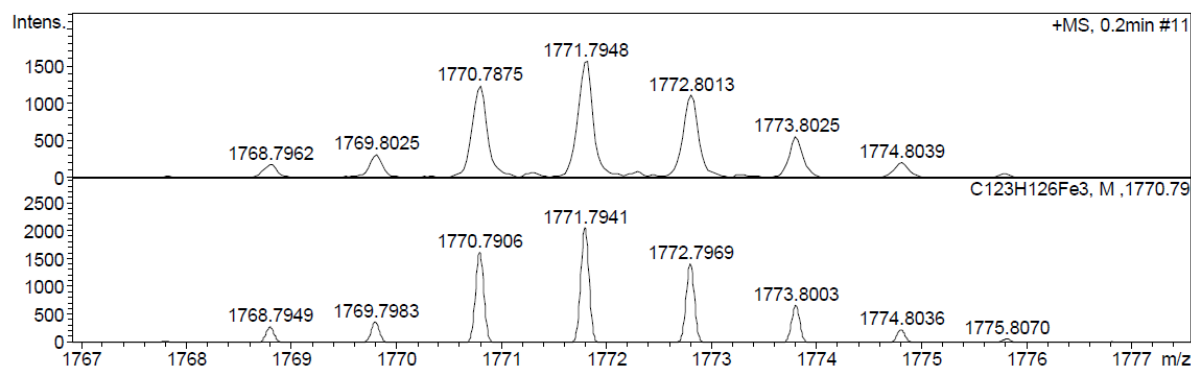

Figure S12. HRMS Spectra of 4c.

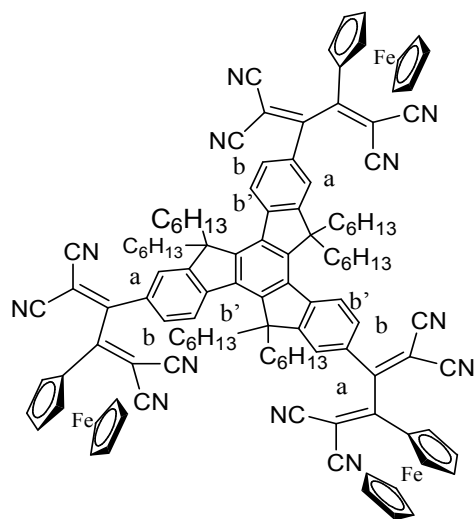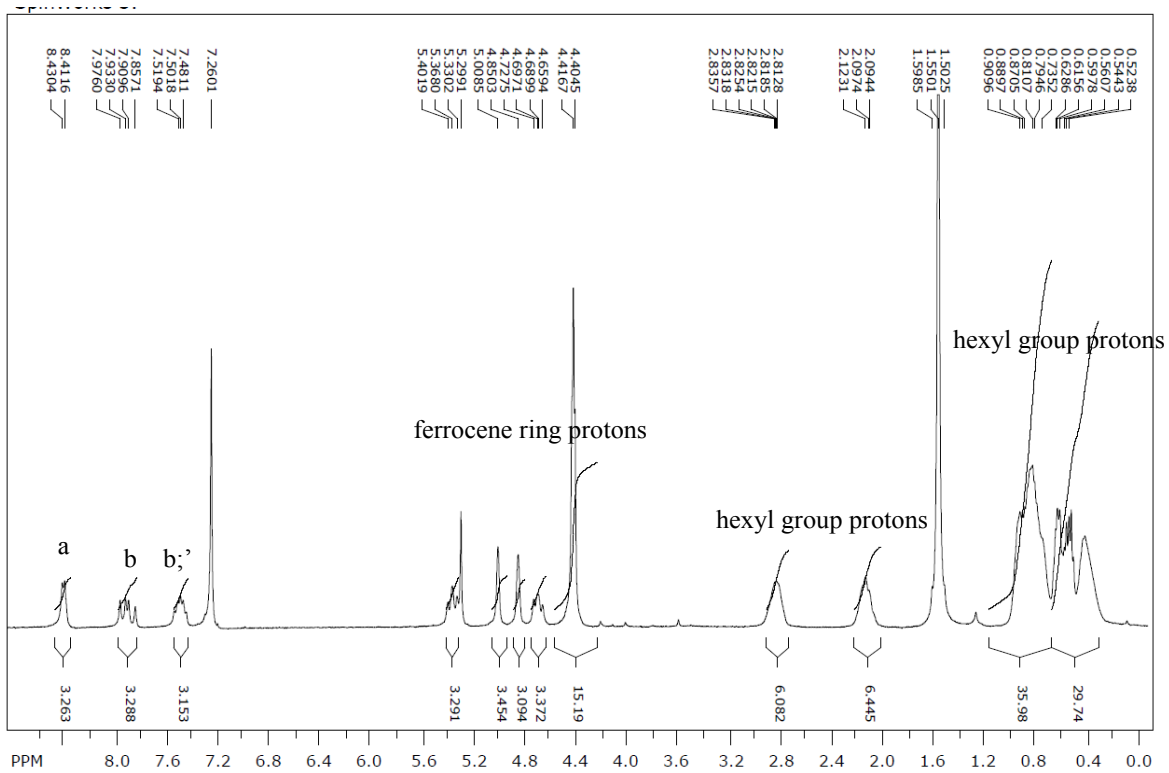

Figure S13. <sup>1</sup>H NMR Spectra of 5a.

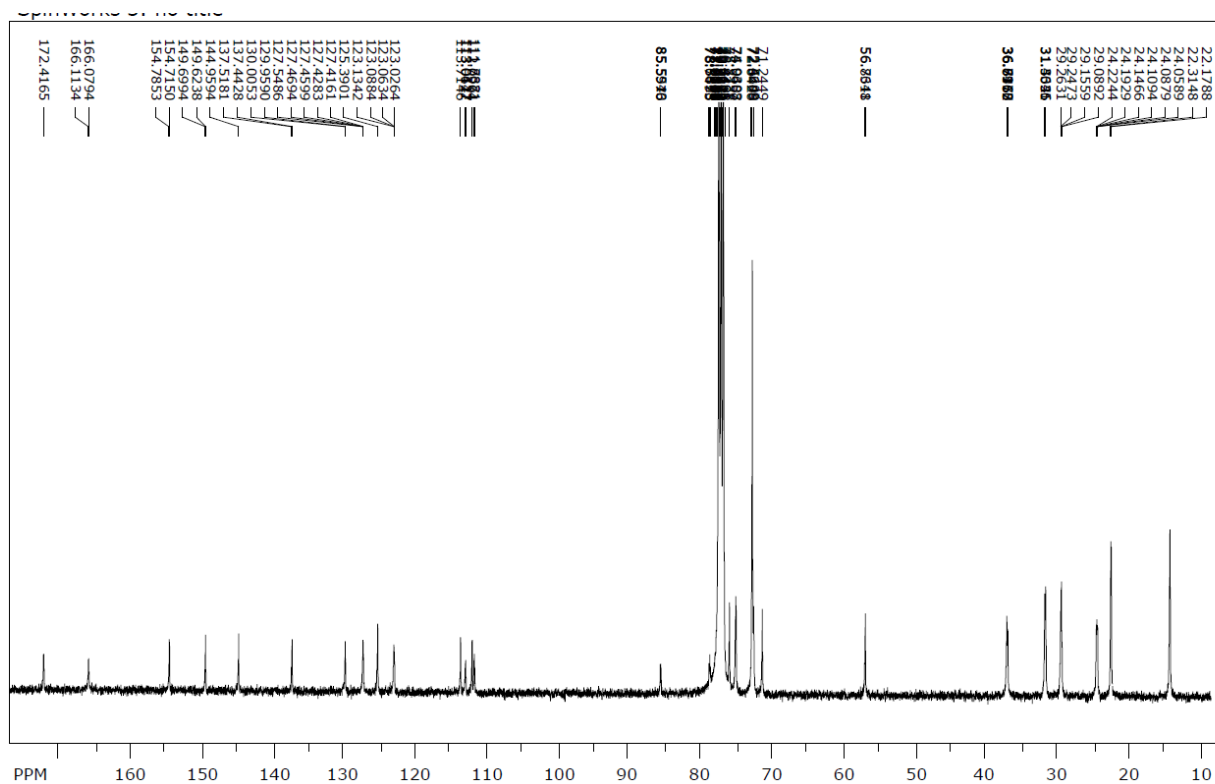

Figure S14.  $^{13}\text{C}$  NMR Spectra of 5a.

## Display Report

### Analysis Info

Analysis Name D:\Data\December 2013\RM-RS-1-71-R3 30-12-2013.d  
Method tune\_high.m  
Sample Name 0  
Comment

Acquisition Date 12/30/2013 5:13:31 PM

Operator Ghanashyam Bhavsar  
Instrument micrOTOF-Q II 10348

### Acquisition Parameter

|             |            |                       |            |                  |           |
|-------------|------------|-----------------------|------------|------------------|-----------|
| Source Type | ESI        | Ion Polarity          | Positive   | Set Nebulizer    | 0.4 Bar   |
| Focus       | Not active | Set Capillary         | 4500 V     | Set Dry Heater   | 180 °C    |
| Scan Begin  | 50 m/z     | Set End Plate Offset  | -500 V     | Set Dry Gas      | 4.0 l/min |
| Scan End    | 3000 m/z   | Set Collision Cell RF | 1600.0 Vpp | Set Divert Valve | Waste     |

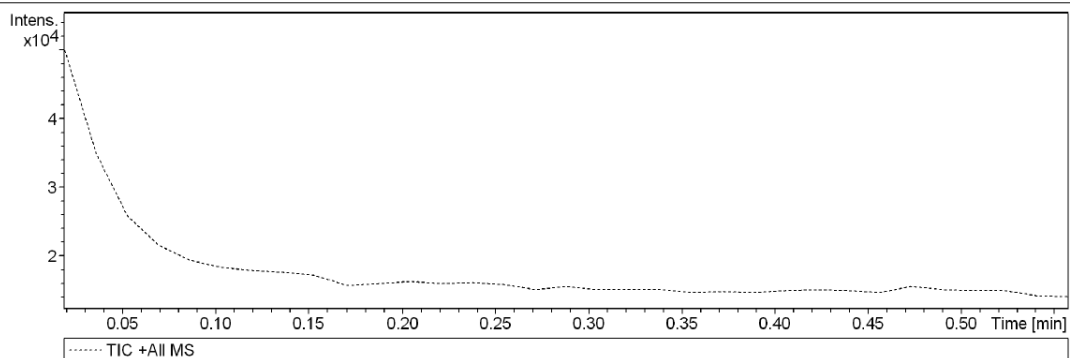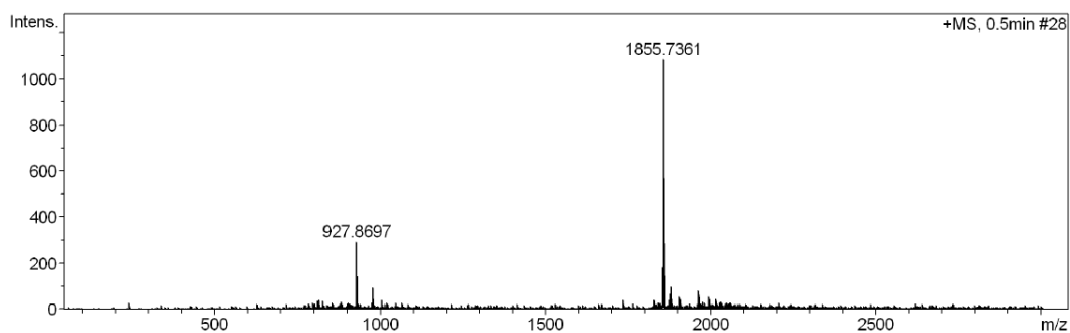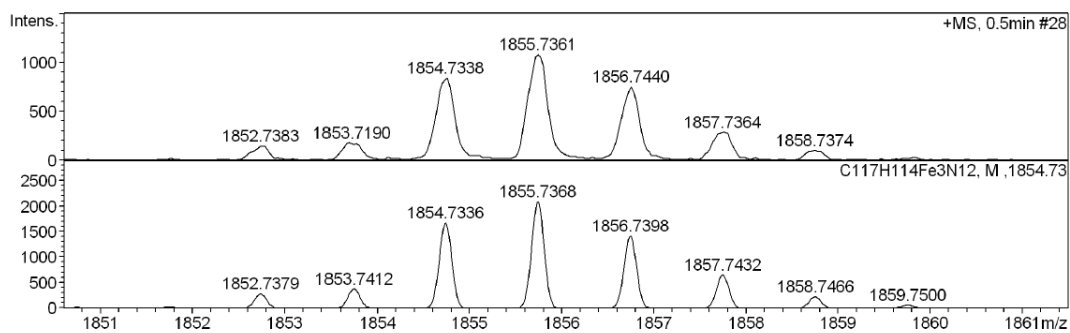

Figure S15. HRMS Spectra of 5a.
